# Supplementary material
Source: PubMed Central journal article supplement (PMC7355021)
Supplement: pnas.1922821117.sapp.pdf [file pnas.1922821117.sapp.pdf]

# PNAS

[www.pnas.org](http://www.pnas.org)

Supplementary Information for

**Functions of paralogous RNA Polymerase III subunits POLR3G and POLR3GL in mouse development**

Xiaoling Wang,<sup>a,1</sup> Alan Gerber<sup>a,2</sup>, Wei-Yi Chen<sup>a,3</sup> and Robert G. Roeder<sup>a,4</sup>

<sup>a</sup>Laboratory of Biochemistry and Molecular Biology, The Rockefeller University, New York, NY 10065, USA

<sup>1</sup>Present address: Renal Research Institute, 315 E 62<sup>nd</sup> street, New York, NY, 10065

<sup>2</sup>Present address: Department of Chemistry and Pharmaceutical Sciences, VU University

Amsterdam, De Boelelaan 1083, 1081 HZ Amsterdam, The Netherlands

<sup>3</sup>Present address: Institute of Biochemistry and Molecular Biology, National Yang-Ming University, Taipei 112, Taiwan

<sup>4</sup>Corresponding Author:

Robert G Roeder

212-327-7600

**Email:** [roeder@rockefeller.edu](mailto:roeder@rockefeller.edu)

**This PDF file includes:**

Supplementary Figures (Figures S1 to S4)

Supplementary Tables (Table S1 and S2)

## Supplementary Figures

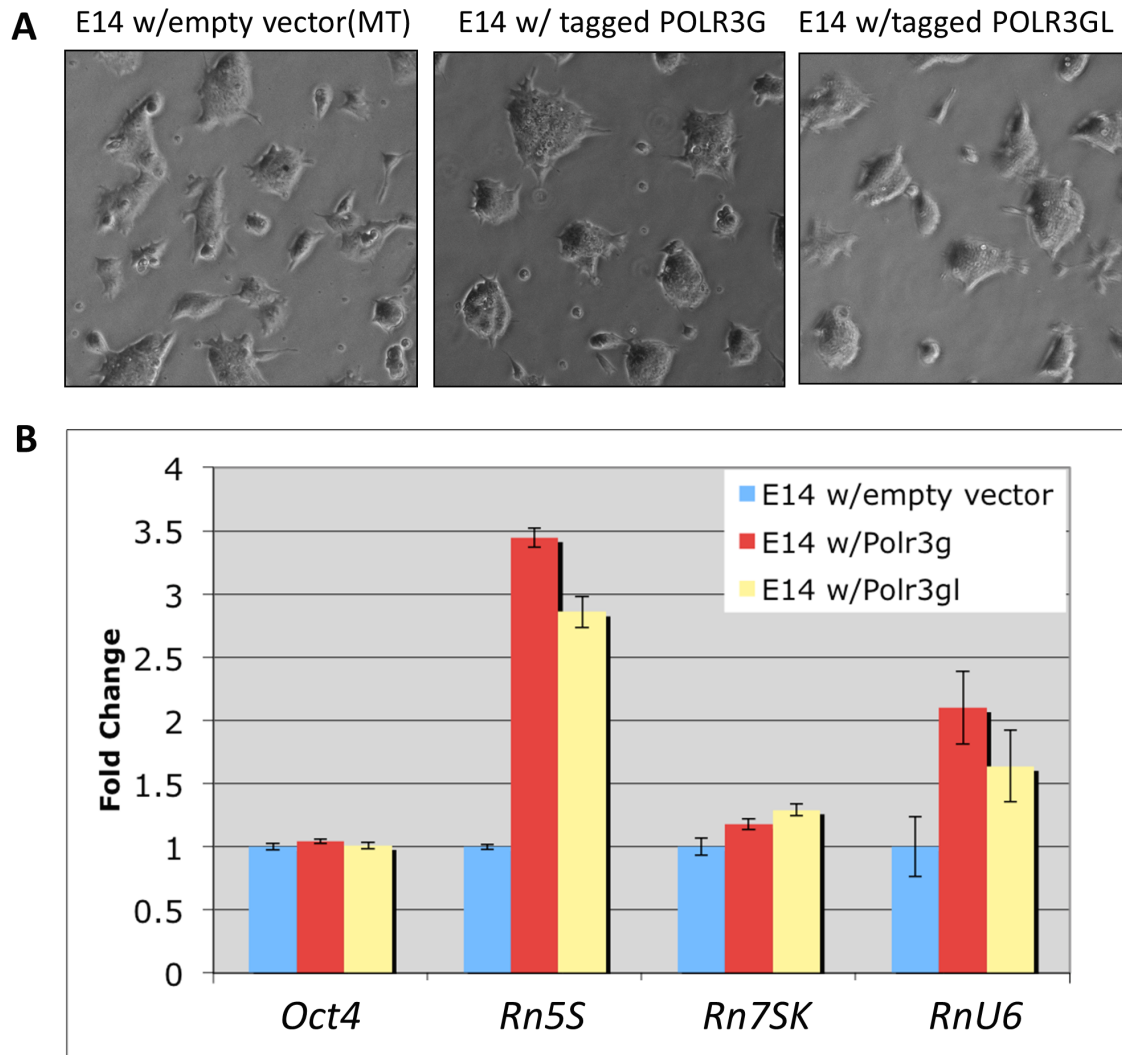

**Fig. S1. (A)** Overexpression of either POLR3G or POLR3GL does not alter stem cell morphology as observed microscopically. **(B)** RT-qPCR analysis of the ESC pluripotency marker *Pou5f1* and expression of Pol III-transcribed *Rn5S*, *Rn7SK* and *RnU6* genes in control (E14TG2a w/ empty vector) and in POLR3G- and POLR3GL-overexpressing cells. The results indicate that overexpression of POLR3G or POLR3GL does not alter expression of Pol II-transcribed pluripotency marker *Oct4* but slightly, moderately or significantly increases expression, respectively, of the *Rn7SK*, *RnU6*, and *Rn5S* genes, consistent with earlier results indicating in vitro transcription of these genes by human Pol III isoforms (14). However, and most importantly, the differences for these genes between POLR3G- and POLR3GL-overexpressing cells are marginal.

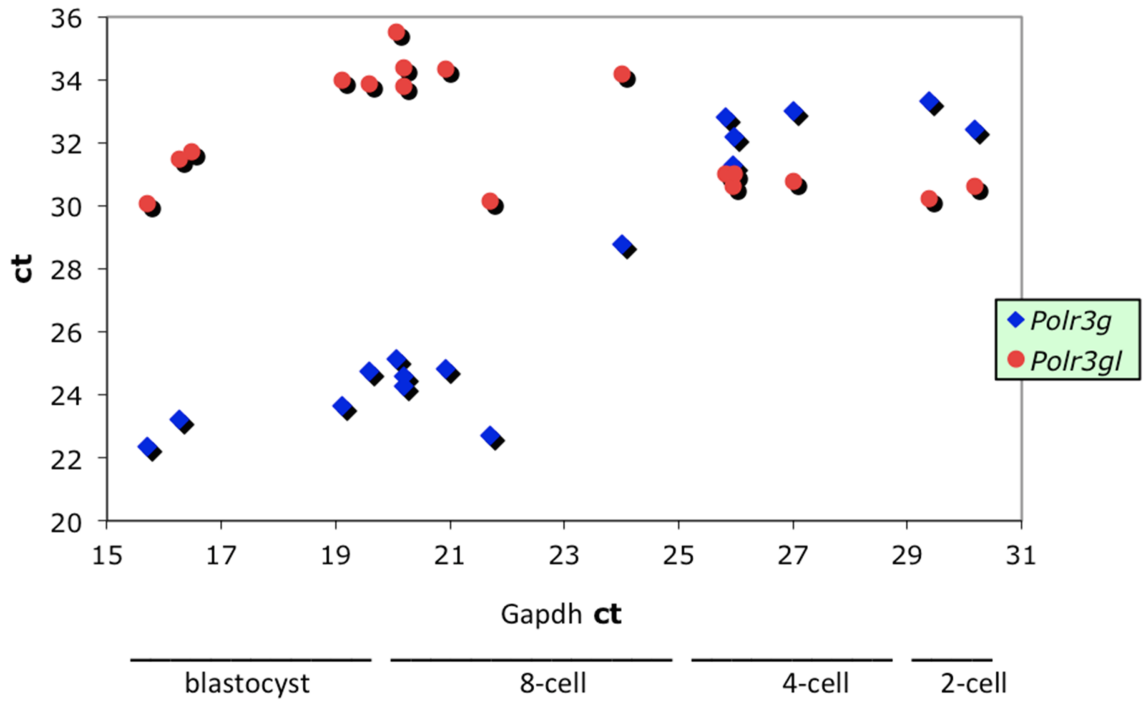

**Fig. S2.** Early RNA expression of *Polr3g* and *Polr3gl* genes detected by single cell to CT experiments from 2-cell stage to blastula stage embryos. Each dot represents one embryo. The X-axis shows the CT value for *Gapdh*. The Y-axis shows the the CT value for *Polr3g* (blue) or *Polr3gl* (red). *Gapdh* expression is increased during early development (as reflected by reduced CT number).

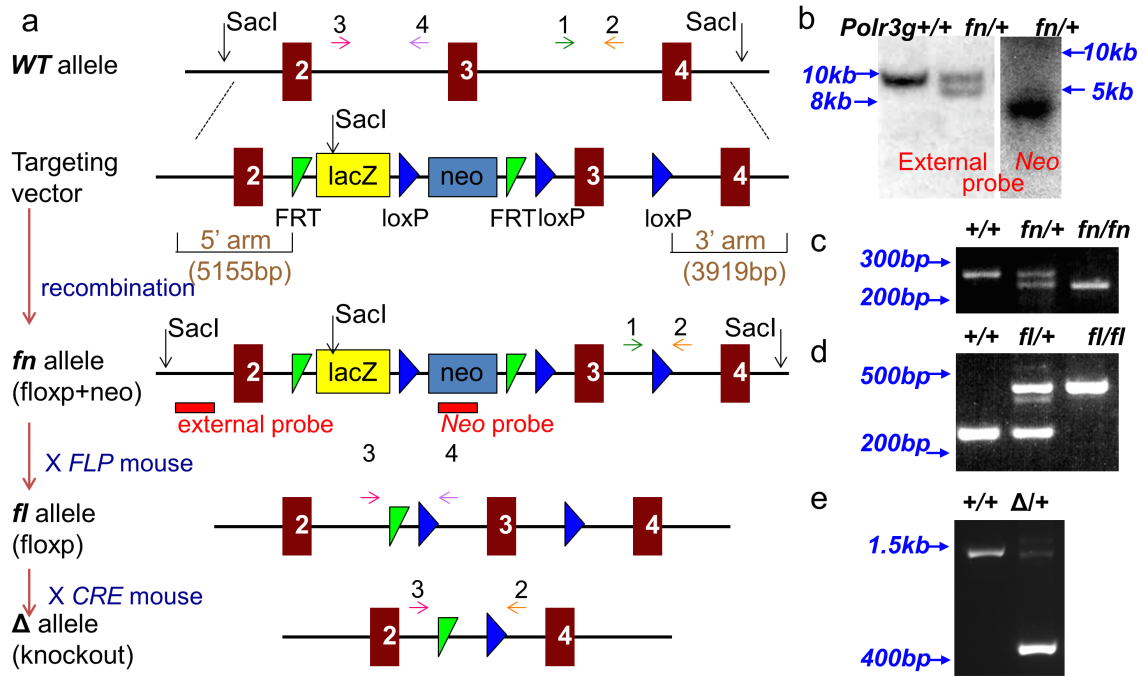

**Fig. S3**

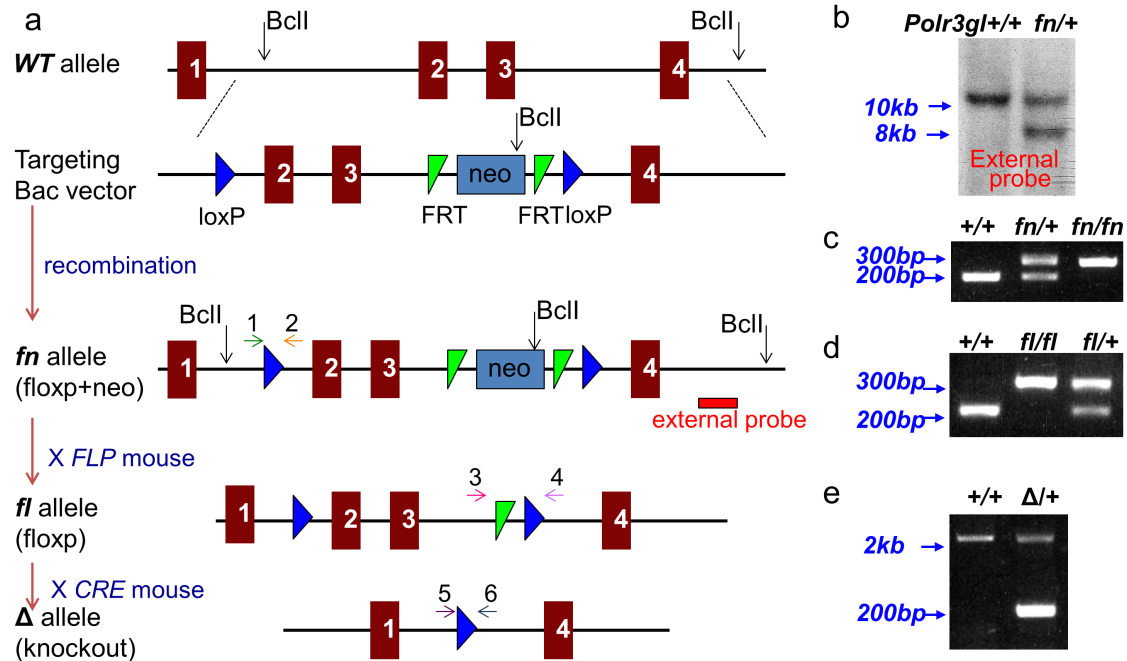

**Fig. S4**

**Fig. S3 and S4.** Generation and validation of *Polr3g* (Fig. S3) and *Polr3gl* (Fig. S4) conditional knockout mice.

**(A)** Diagram of gene targeting and mice crossing procedures. Both targeting vectors were generated by inserting loxP sites (blue triangle) flanking exon(s) and a neomycin cassette (*neo*) flanked by FRT sites (green triangle). Locations of PCR primers are shown by arrows. **(B)** “Knockout-first” alleles (*fn* alleles) were confirmed by Southern blot analysis using both external and neo probes. **(C)** “Knockout-first” alleles (*fn* alleles) were also confirmed by PCR genotyping. **(D)** Mice with *fn* alleles were crossed to transgenic FLP mice to generate conditional knockout (CKO) mice (*f* allele), which were confirmed by PCR genotyping. Both *Polr3g* and *Polr3gl* *fl* homozygous mice were viable without any notable defects. **(E)** The knockout potentials of *f* allele mice were further tested by crossing to transgenic EIIA-CRE mice. After breeding one more generation, it was possible to produce heterozygous Δ alleles. PCR genotyping confirmed the deletion sites.

## **Supplementary Tables**

Table S1. MS analysis showing proteins differentially co-immunoprecipitated with POLR3G versus POLR3GL antibodies.

Table S2. Summary of number of reads and peaks detected in CHIP-seq experiments.

Dataset S1. Lists of peaks detected in Fig. 2C.

Dataset S2. Lists of peaks detected in Fig. 2D.

Dataset S3. Lists of primers

**Table S1:** Summary of non-Pol III proteins detected in immunoprecipitates of POLR3G or POLR3GL

| <b>Detected only in POLR3G pull-down</b> |                                                                                                                 |          |          |
|------------------------------------------|-----------------------------------------------------------------------------------------------------------------|----------|----------|
| Accession                                | Description                                                                                                     | Score    | Coverage |
| 191765                                   | alpha-fetoprotein                                                                                               | 52.69    | 3.11     |
| 81878656                                 | L-threonine 3-dehydrogenase, mitochondrial precursor                                                            | 3786.922 | 63.81    |
| 62201487                                 | Glyceraldehyde-3-phosphate dehydrogenase [Mus musculus]                                                         | 2861.807 | 35.44    |
| 6756039                                  | tyrosine 3-monooxygenase/tryptophan 5-monooxygenase activation protein, theta polypeptide [Mus musculus]        | 289.5953 | 13.47    |
| 123228024                                | <i>peptidyl prolyl isomerase H [Mus musculus]</i>                                                               | 70.932   | 8.86     |
| 149257773                                | <i>PREDICTED: peptidyl-prolyl cis-trans isomerase A-like [Mus musculus]</i>                                     |          |          |
| 148685494                                | mCG22383, isoform CRA_b [Mus musculus] (TIM_phosphate_binding)                                                  | 102.972  | 10.29    |
| 197725012                                | (ubiquitin) Chain B, Crystal Structure Of Human Amsh-Lp Dub Domain In Complex With Lys63-Linked Ubiquitin Dimer | 463.5471 | 50       |

| <b>Detected only in POLR3GL Pull-down</b> |                                                                                    |          |          |
|-------------------------------------------|------------------------------------------------------------------------------------|----------|----------|
| Accession                                 | Description                                                                        | Score    | Coverage |
| 29612546                                  | Transcription elongation factor B (SIII), polypeptide 3 [Mus musculus] (Elongin-A) | 33.44    | 1.94     |
| 74211667                                  | Hsp73                                                                              | 474.8507 | 24.59    |

**Table S2:** Summary of number of reads and peaks detected in ChIP-seq experiments<sup>a</sup> peak called by Homer program<sup>b</sup> identified peaks were examined by IGV visualization to set the thresholds of

| ChIP-seq experiment | Total reads | Uniquely aligned reads | Number of peaks     |                        | Mapping Efficiency (%) |
|---------------------|-------------|------------------------|---------------------|------------------------|------------------------|
|                     |             |                        | Called <sup>a</sup> | Validated <sup>b</sup> |                        |
| input_ES            | 30,275,598  | 18,465,288             |                     |                        | 61                     |
| 3C_ES               | 19,956,879  | 12,147,386             | 1,021               | <u>317<sup>c</sup></u> | 61                     |
| 3G_ES               | 31,651,234  | 19,674,803             | 533                 | <u>243<sup>d</sup></u> | 62                     |
| 3GL_ES              | 35,987,871  | 21,016,069             | 195                 | <u>13<sup>d</sup></u>  | 58                     |
| Pol II_ES           | 37,389,466  | 25,369,634             |                     |                        | 68                     |
| input_pMEF          | 29,392,063  | 14,496,555             |                     |                        | 49                     |
| 3C_pMEF             | 29,360,199  | 18,843,549             | 397                 | <u>275<sup>e</sup></u> | 64                     |
| 3G_pMEF             | 30,934,711  | 20,319,371             | 272                 | <u>264<sup>d</sup></u> | 66                     |
| 3GL_pMEF            | 30,402,871  | 20,000,609             | 190                 | <u>177<sup>d</sup></u> | 66                     |
| Pol II_pMEF         | 34,423,268  | 24,648,991             |                     |                        | 72                     |

Normalized Tag Count for each ChIP-seq experiment.

<sup>c</sup> the threshold of Normalized Tag Count is 260<sup>d</sup> the threshold of Normalized Tag Count is 15<sup>e</sup> the threshold of Normalized Tag Count is 40
